# Supplementary material
Source: HighWire-hosted journal article supplement (https://qualitysafety.bmj.com/content/29/10/1.4)
Supplement: inline-supplementary-material-1 [file inline-supplementary-material-1.pdf]

**Appendix Table 1: Individual contributions of the top 15 contributors to laboratory test expenditure on medical units from the period of 2015-2018 in four adult tertiary care hospitals in Calgary, Canada**

| <b>Laboratory Test</b>                                      | <b>% contribution to total expenditure on laboratory testing</b> |
|-------------------------------------------------------------|------------------------------------------------------------------|
| <i>Complete Blood Count and differential</i>                | 15.7                                                             |
| <i>Electrolytes (Sodium/Potassium/Chloride/Bicarbonate)</i> | 9.2                                                              |
| <i>Creatinine and Urea</i>                                  | 8.5                                                              |
| <i>Extended electrolytes (Calcium/Magnesium/Phosphate)</i>  | 6.2                                                              |
| <i>Coagulation studies (PT INR/PTT)</i>                     | 5.7                                                              |
| Liver Studies (ALT/Total and direct bilirubin/AST/ALP/GGT)  | 4.9                                                              |
| Blood Gas Arterial                                          | 3.2                                                              |
| Respiratory Infection Panel (Viral)                         | 3.2                                                              |
| MRSA swab                                                   | 2.9                                                              |
| Blood culture                                               | 2.8                                                              |
| Anti-GBM (GBM, ANCA, MPO, PR3, ANA)                         | 2.1                                                              |
| Vancomycin LEVEL                                            | 1.3                                                              |
| Troponin                                                    | 1.3                                                              |
| CK                                                          | 1.2                                                              |
| Alpha-1 Antitrypsin                                         | 1.1                                                              |

PT INR=Prothrombin Time International Normalized Ratio; PTT: Partial Thromboplastin Time; ALT: Alanine Aminotransferase; AST: Aspartate Aminotransferase; ALP: Alkaline Phosphatase; GGT: Gamma-glutamyltransferase; MRSA: Methicillin Resistant Staphylococcus aureus; GBM: Glomerular Basement Membrane; ANCA: antineutrophil cytoplasmic antibodies; MPO: Myeloperoxidase; PR3: Proteinase 3; ANA: Antinuclear antibody; CK: Creatine kinase

Appendix Table 2: Appropriate use criteria developed by local consensus

| Laboratory Test                            | General Indications                                                                                                                                                                                              | Frequency Recommendations                                                                                                             | Costs (in CAD)         |
|--------------------------------------------|------------------------------------------------------------------------------------------------------------------------------------------------------------------------------------------------------------------|---------------------------------------------------------------------------------------------------------------------------------------|------------------------|
| Complete Blood Count                       | Active Bleeding<br>Acute infection/inflammation<br>Abnormal cell lines<br>Post transfusion<br>HITT monitoring                                                                                                    | Active Bleeding: q4-6h<br>Acute infection/inflammation: Daily<br>Stable patient: None                                                 | \$7.00                 |
| Electrolytes (Na, K, Cl, CO <sub>2</sub> ) | DKA<br>Hypo/Hyperkalemia<br>Hypo/Hyponatremia<br>Metabolic acidosis/Alkalosis<br>Tumor Lysis<br>Arrhythmias<br>Prolonged QT <sub>c</sub><br>Refeeding syndrome<br>Electrolyte replacement<br>AKI<br>Diuretic use | DKA with gap: q2h<br>Severe Na or K derangement: q4h<br>General indications: Daily<br>No indications: None<br>Stable patient: None    | \$5.00 (Total or Each) |
| Creatinine                                 | AKI<br>Nephrotoxic agents<br>Post contrast<br>Sepsis<br>Systemic Vasculitis<br>Large volume paracentesis                                                                                                         | General indications: Daily<br>No indications: None<br>Stable patients: None<br>Note: Do not order daily on people on chronic dialysis | \$5.00                 |
| Urea                                       | Osmolar Gap<br>GI bleed<br>Uremic encephalopathy for consideration of dialysis                                                                                                                                   | Most indications: Once<br>Uremic encephalopathy prior to dialysis: Daily<br>No indications: None<br>Stable patient: None              | \$5.00                 |

|                                          |                                                                                                                                                                                 |                                                                                                                                                                                     |                        |
|------------------------------------------|---------------------------------------------------------------------------------------------------------------------------------------------------------------------------------|-------------------------------------------------------------------------------------------------------------------------------------------------------------------------------------|------------------------|
| <b>Coagulation (PT/INR)</b>              | <b>Bleeding diathesis<br/>Anticoagulants<br/>Sepsis/DIC<br/>Tylenol OD/EtOH hepatitis<br/>Liver dysfunction/failure<br/>Prior to invasive procedures</b>                        | <b>Tylenol OD/Liver failure: q6-8h<br/>Most indications: Daily<br/>No indications: None<br/>Stable patient: None<br/>Note: No daily INRs for stable INR on stable warfarin dose</b> | <b>\$7.50</b>          |
| <b>Coagulation (PTT)</b>                 | <b>IV Heparin<br/>Bleeding diathesis<br/>Anti-Phospholipid Antibody</b>                                                                                                         | <b>IV heparin: Per Protocol<br/>Most indications: Once<br/>No indications: None<br/>Stable patients: None</b>                                                                       | <b>\$7.50</b>          |
| <b>Extended Electrolytes (Ca, Mg, P)</b> | <b>DKA: all<br/>Drug Overdose: all<br/>Arrhythmias: Ca/Mg<br/>Prolonged QT: Ca/Mg<br/>Re-feeding Syndrome: all<br/>Refractory Hypokalemia: Mg<br/>Active replacement of any</b> | <b>Re-feeding syndrome: q6-12h<br/>Most indications: Daily<br/>No indications: None<br/>Stable patients: None<br/>Note: most patients do not require daily extended lytes</b>       | <b>\$5.00 For Each</b> |
| <b>CK</b>                                | <b>Rhabdomyolysis<br/>Severely low phosphate<br/>Suspicion for myopathy</b>                                                                                                     | <b>Daily if rhabdo until normalizes<br/>Once<br/>Once</b>                                                                                                                           | <b>\$15.00</b>         |

Appendix Fig 1: Development and Implementation of the Intervention bundle

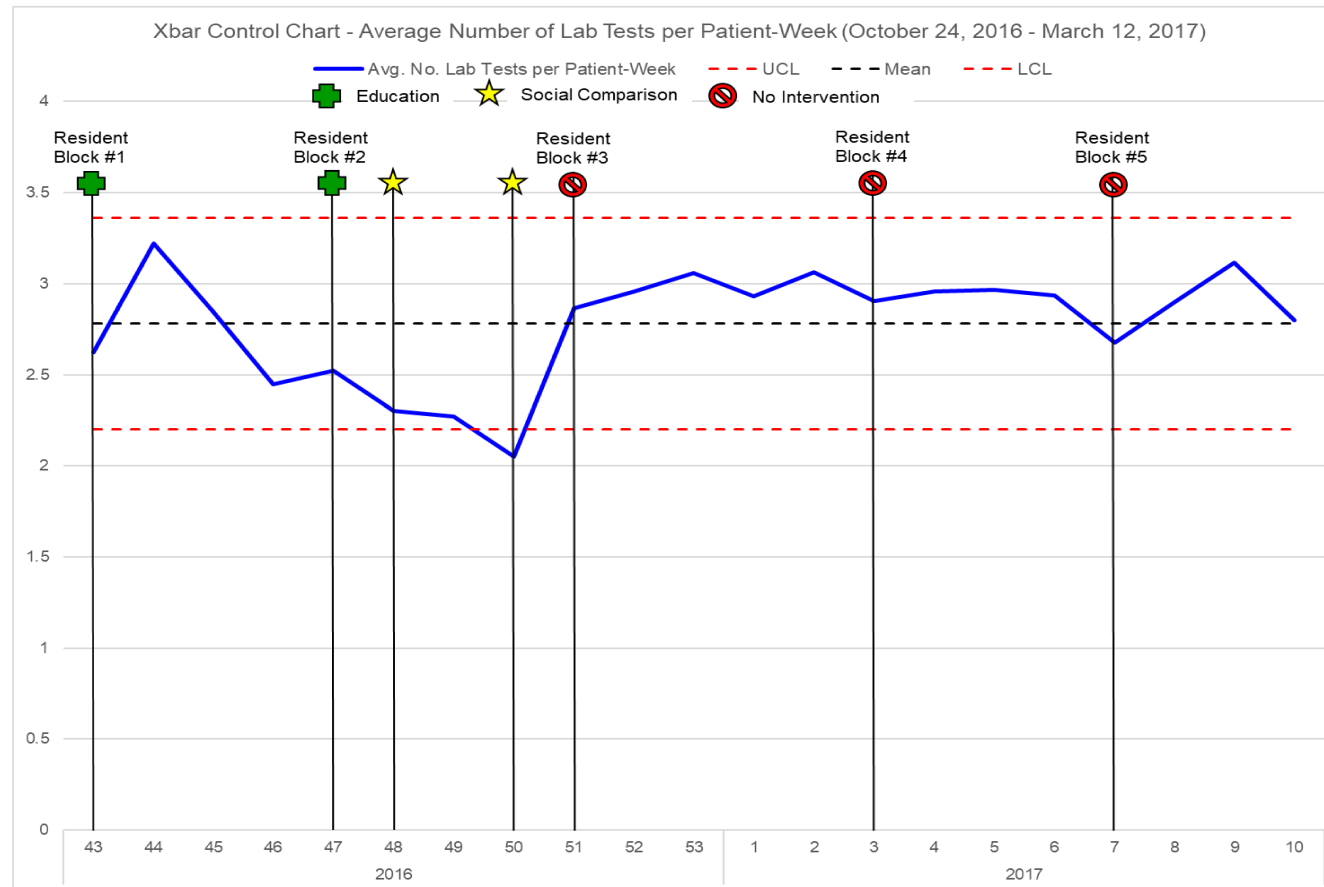

The multicomponent intervention bundle was developed over five 4-week resident rotation blocks. The first trial block saw the implementation of the education arm of the intervention. Education occurred during learner orientation on the first day of the block, which consisted of five minutes of orientation to the initiative and to the locations of the educational posters on the unit. In addition, each learner received pocket cards outlining laboratory utilization appropriate criteria, frequency recommendations and costs. During the second block, we added social comparison between the three medical teams in the intervention hospital. Social comparison was provided via written information on the whiteboard of the team meeting rooms and occurred twice during the block (week 2 and week 4). No

intervention was delivered on the third block, which occurred over the holiday season. During blocks 4 and 5, no active intervention was delivered. During this time, the QI committee convened to review the interim results from our intervention trials and seek input from all stakeholders to refine the interventions.

## Appendix Figure 2: Individual physician laboratory test utilization feedback

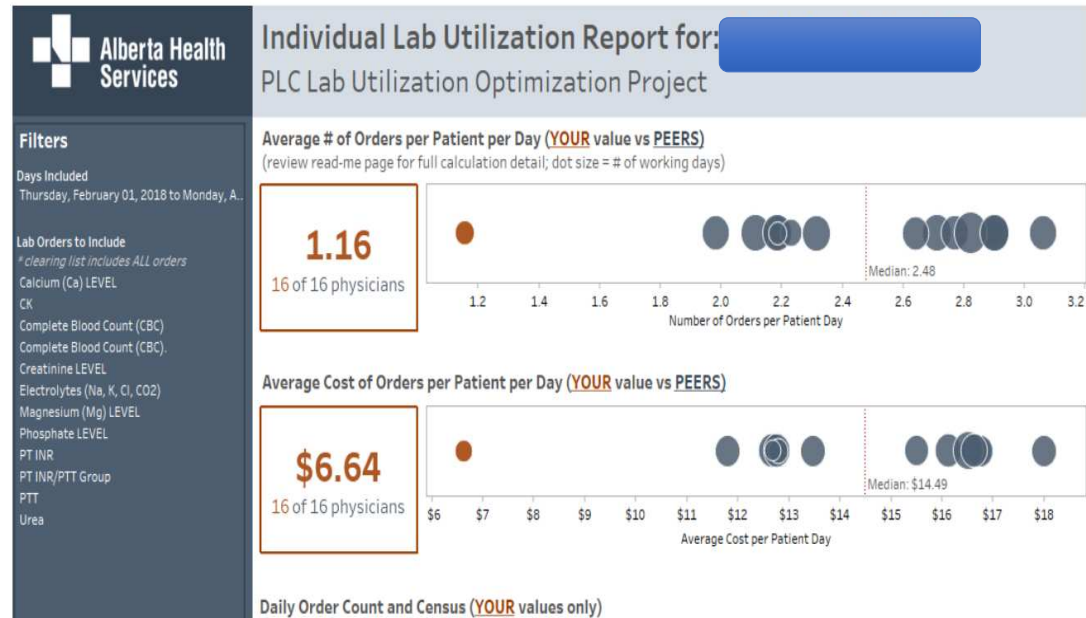

## Appendix Table 3: Complete list of all critical laboratory test results as defined by our laboratory services

| Laboratory Test | Critical lab values                               |
|-----------------|---------------------------------------------------|
| Total calcium   | Less than 1.65 mmol/L<br>Greater than 3.25 mmol/L |
| Potassium       | Less than 2.60 mmol/L<br>Greater than 6.20 mmol/L |
| Phosphate       | Less than 0.4 mmol/L                              |
| Sodium          | Less than 120 mmol/L<br>Greater than 155 mmol/L   |

|                                |                                                                    |
|--------------------------------|--------------------------------------------------------------------|
| Hemoglobin                     | Equal to or less than 60 g/L                                       |
| Platelet                       | Less than $20 \times 10^9/L$                                       |
| Absolute neutrophil count      | Less than $0.6 \times 10^9/L$                                      |
| White blood cell count         | Less than $0.6 \times 10^9/L$<br>Greater than $99.9 \times 10^9/L$ |
| International Normalized Ratio | Greater than 5                                                     |
| Partial thromboplastin time    | Equal to or greater than 120s                                      |

## Appendix Figure 3:

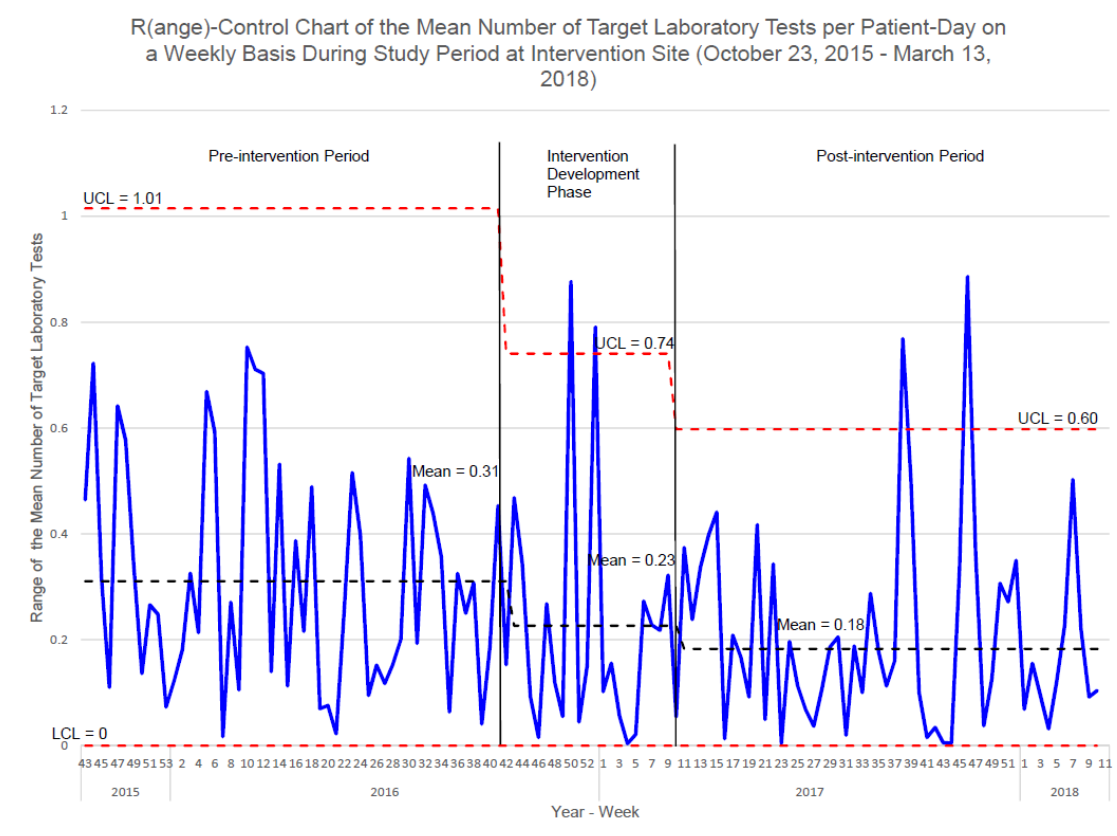

At the intervention site, we note a reduction in the range of the mean number of target laboratory tests ordered per patient-day on a weekly basis during the study period.
